# Supplementary material for: Let-7g suppresses both canonical and non-canonical NF-κB pathways in macrophages leading to anti-atherosclerosis
Source: PubMed Central journal article supplement (PMC5731853; doi:10.18632/oncotarget.18197), 2017-05-23
Supplement: oncotarget-08-101026-s001.pdf [file oncotarget-08-101026-s001.pdf]

## Let-7g suppresses both canonical and non-canonical NF-κB pathways in macrophages leading to anti-atherosclerosis

### SUPPLEMENTARY MATERIALS

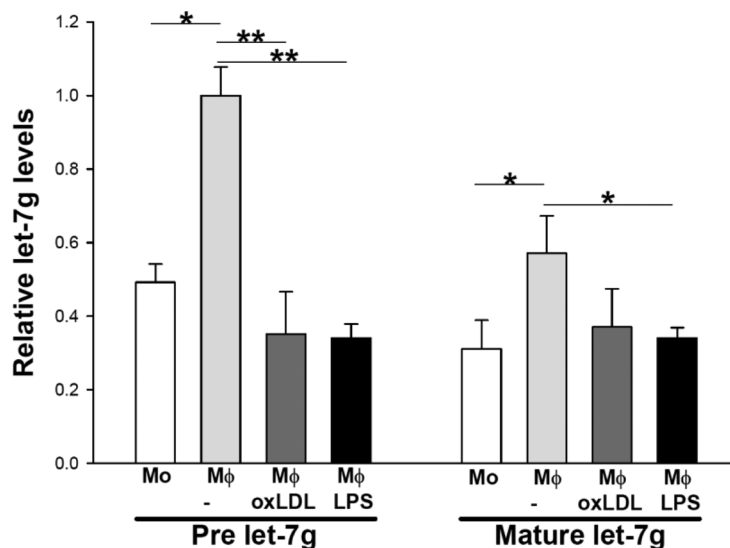

**Supplementary Figure 1: Quantitative analysis of northern blot for biotin labeled mature and pre-microRNA let-7g in monocyte or macrophage treated with oxLDL or LPS.** The amount of RNA loaded in each well was normalized to the amount of U6. Data are presented as mean ± SEM. \* < 0.05; \*\* < 0.01.

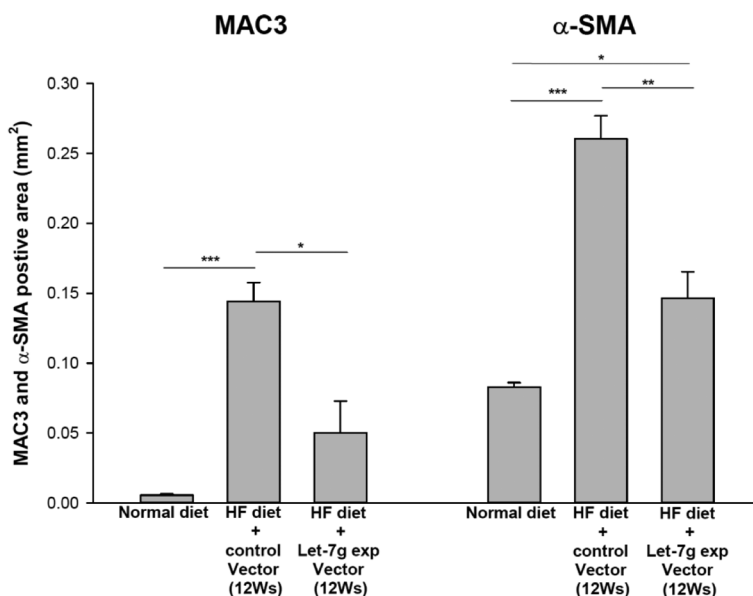

**Supplementary Figure 2: Quantitative analysis of fluorescently labeled MAC3 and α-SMA of let-7g's effect in apoE KO mice under a HF diet for 12 weeks.** Data are presented as mean ± SEM from three independent experiments. \* < 0.05; \*\* < 0.01; \*\*\* < 0.001.

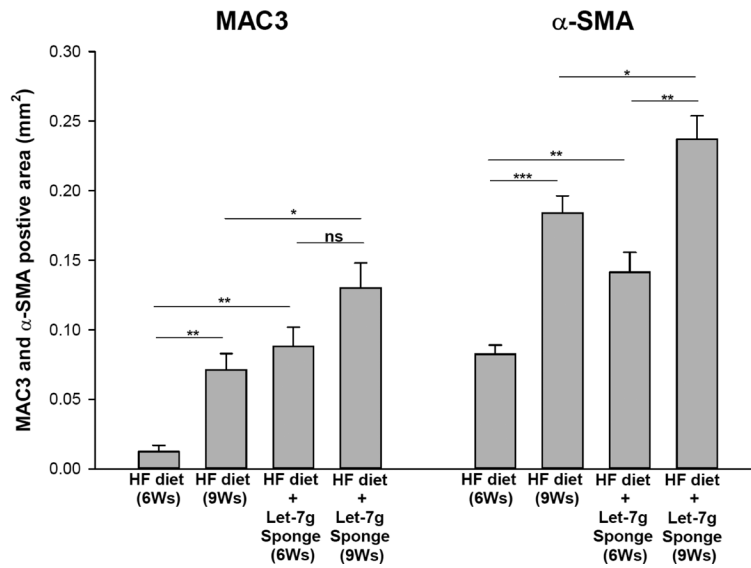

**Supplementary Figure 3: Quantitative analysis of fluorescence labeled MAC3 and  $\alpha$ -SMA of let-7g's knock-out effect in apoE KO mice under a HF diet for 6 or 9 weeks.** Data are presented as mean  $\pm$  SEM from three independent experiments. \* < 0.05; \*\* < 0.01; \*\*\* < 0.001.

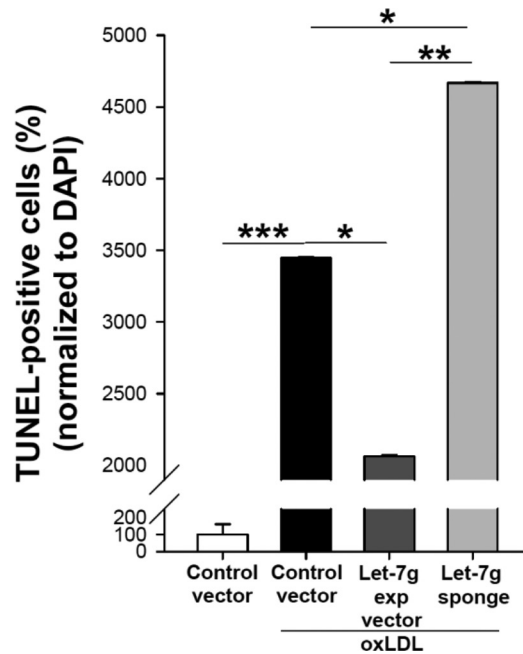

**Supplementary Figure 4: Quantitative analysis of TUNEL-positive macrophages of let-7g's effect.** Data are presented as mean  $\pm$  SEM from three independent experiments. \* < 0.05; \*\* < 0.01; \*\*\* < 0.001.

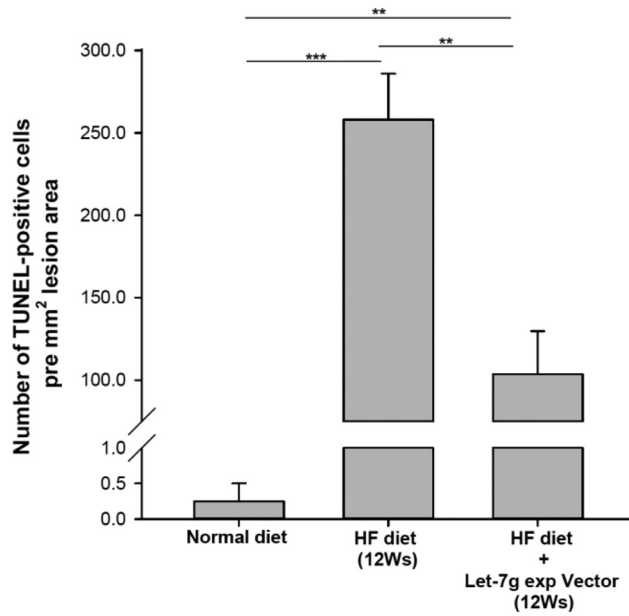

**Supplementary Figure 5: Quantitative analysis of TUNEL-positive cells in apoE KO mice aortic sections of let-7g's effect.** Data are presented as mean ± SEM from three independent experiments. \* < 0.05; \*\* < 0.01; \*\*\* < 0.001.

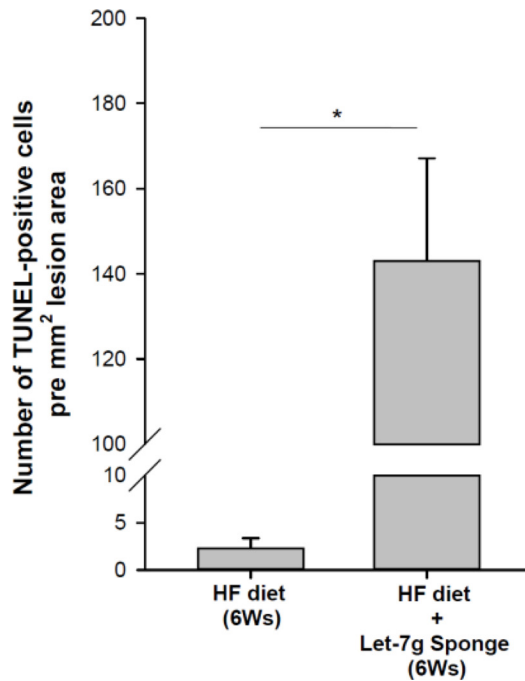

**Supplementary Figure 6: Quantitative analysis of TUNEL-positive cells in apoE KO mice aortic sections of let-7g's knock-out effect.** Data are presented as mean ± SEM from three independent experiments. \* < 0.05; \*\* < 0.01; \*\*\* < 0.001.

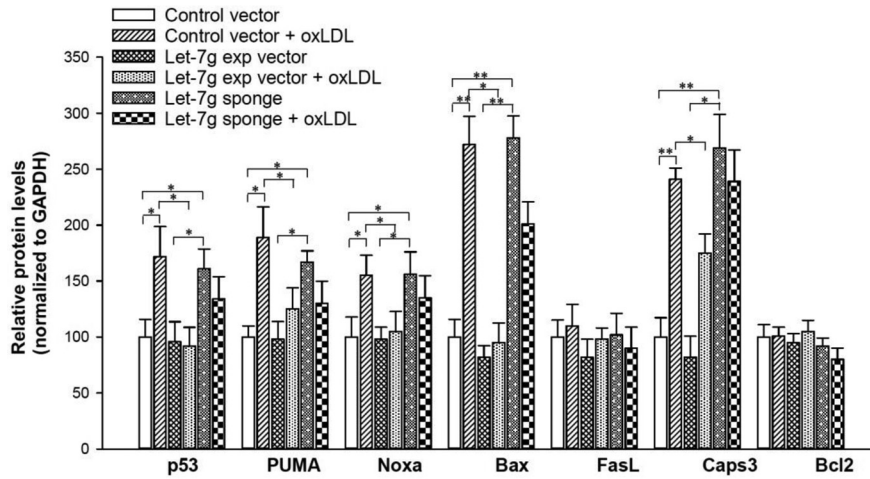

Supplementary Figure 7: Semi-quantitative western blot data of let-7g's effect on the p53-signaling in oxLDL-treated macrophages.

NF-κB Signaling

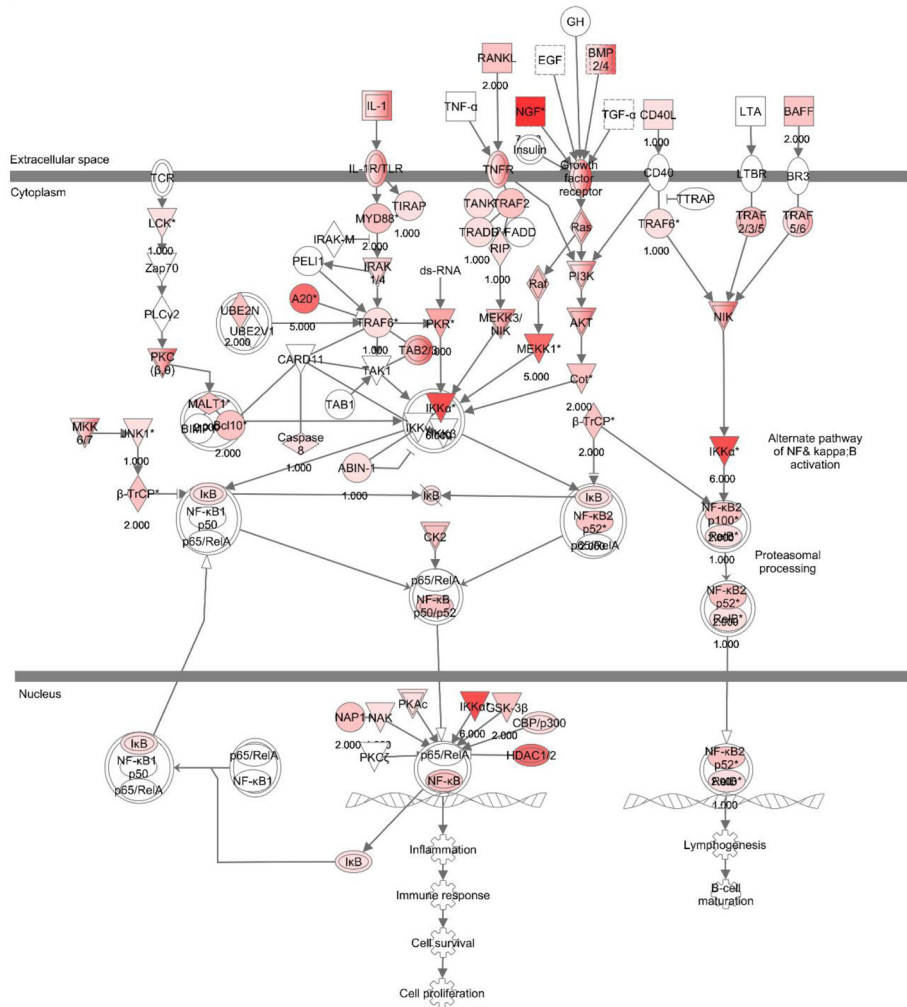

Supplementary Figure 8: Potential let-7g target genes involved in the NF-κB signaling pathway by ingenuity pathway analysis (IPA).

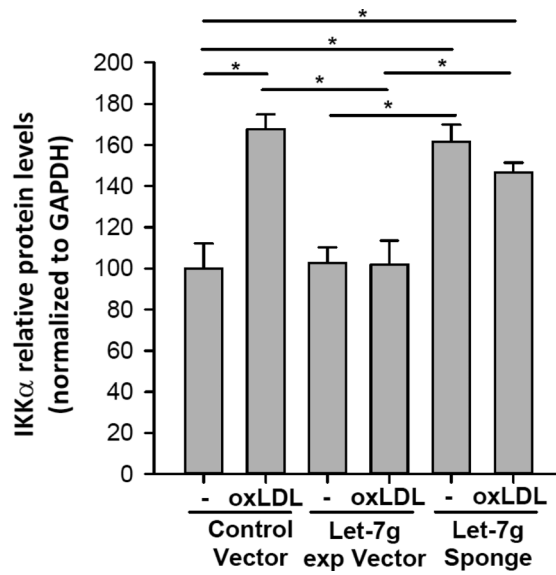

**Supplementary Figure 9: Semi-quantitative western blot data of let-7g's effect on IKK $\alpha$  relative proteins expression in macrophages.** Data are presented as mean  $\pm$  SE from 3 independent experiments. \* $<$  0.05; \*\* $<$  0.01; \*\*\* $<$  0.001.

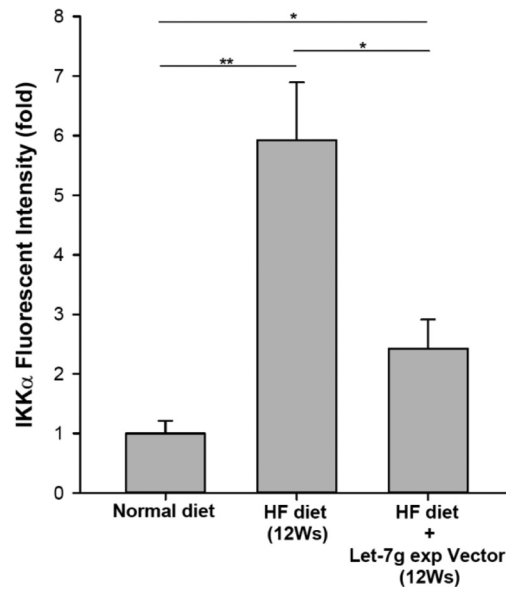

**Supplementary Figure 10: Quantitative analysis of fluorescence labeled plaques of let-7g's effect on IKK $\alpha$  expression in apoE KO mice under a HF diet for 12 weeks.** Data are presented as mean  $\pm$  SEM from three independent experiments. \* $<$  0.05; \*\* $<$  0.01.

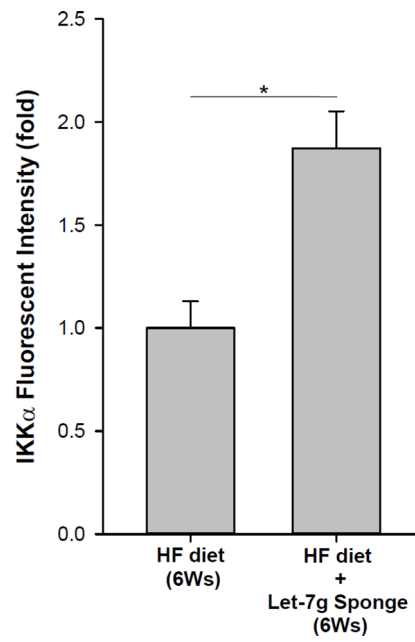

**Supplementary Figure 11: Quantitative analysis of fluorescence labeled plaques of let-7g's knock-out effect on IKK $\alpha$  expression in apoE KO mice under a HF diet for 6 weeks.** Data are presented as mean  $\pm$  SEM from three independent experiments. \* $<$  0.05

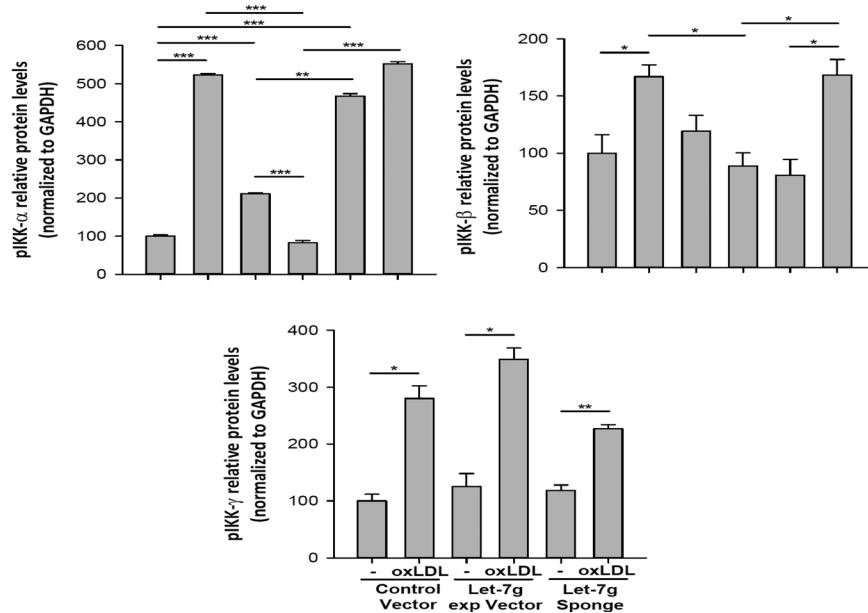

**Supplementary Figure 12: Semi-quantitative western blot data of let-7g's effect on phosphorylated- $\text{IKK}\alpha$ ,  $\text{IKK}\beta$  and  $\text{IKK}\gamma$  relative proteins expression in macrophages.** Data are presented as mean  $\pm$  SE from 3 independent experiments. \* $<$ 0.05; \*\* $<$  0.01; \*\*\* $<$  0.001.

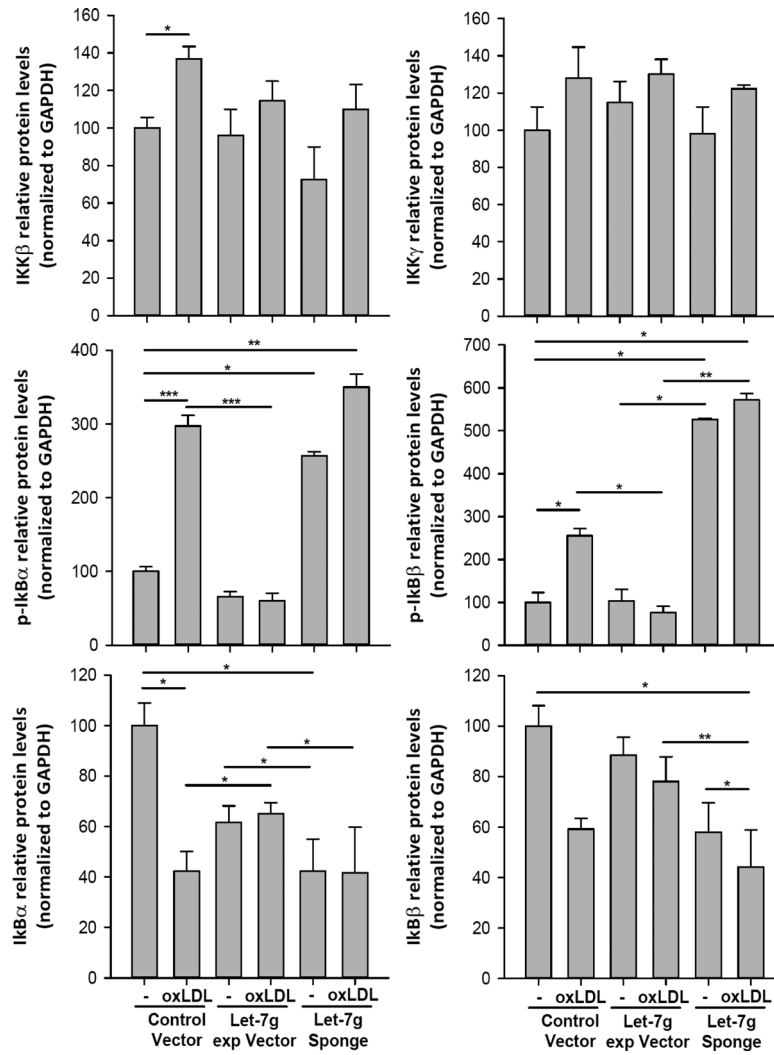

**Supplementary Figure 13: Semi-quantitative western blot data of let-7g's effect on IKKβ, IKKγ, IκBα, IκBβ, phosphorylated-IκBα (p-IκBα) and p-IκBβ relative proteins expression in macrophages.** Data are presented as mean ± SEM from 3 independent experiments. \* < 0.05; \*\* < 0.01; \*\*\* < 0.001.

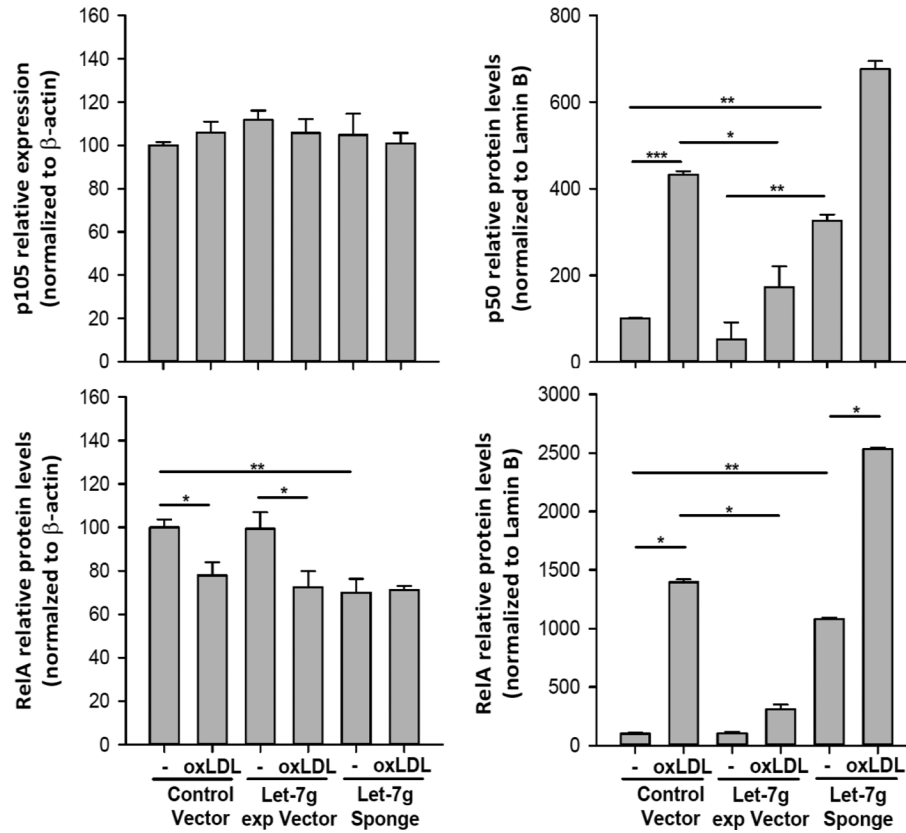

Supplementary Figure 14: Semi-quantitative western blot data of let-7g's effect on p105, p50 and RelA relative proteins expression in macrophages. Data are presented as mean  $\pm$  SEM from 3 independent experiments. \* $<$  0.05; \*\* $<$  0.01; \*\*\* $<$  0.001.

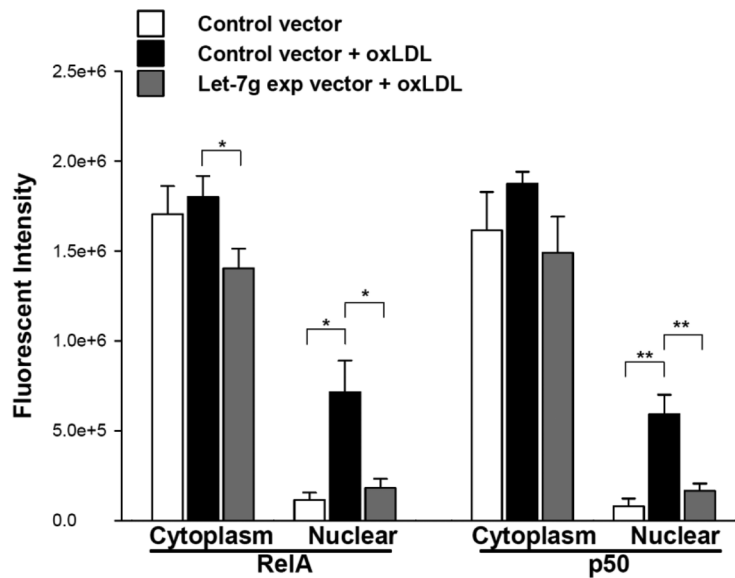

Supplementary Figure 15: Semi-quantitative analysis of RelA or p50 fluorescence in the oxLDL treated-macrophages treated with control vector or Let-7g exp vector. Data are presented as mean  $\pm$  SEM from 3 independent experiments. \* $<$  0.05; \*\* $<$  0.01



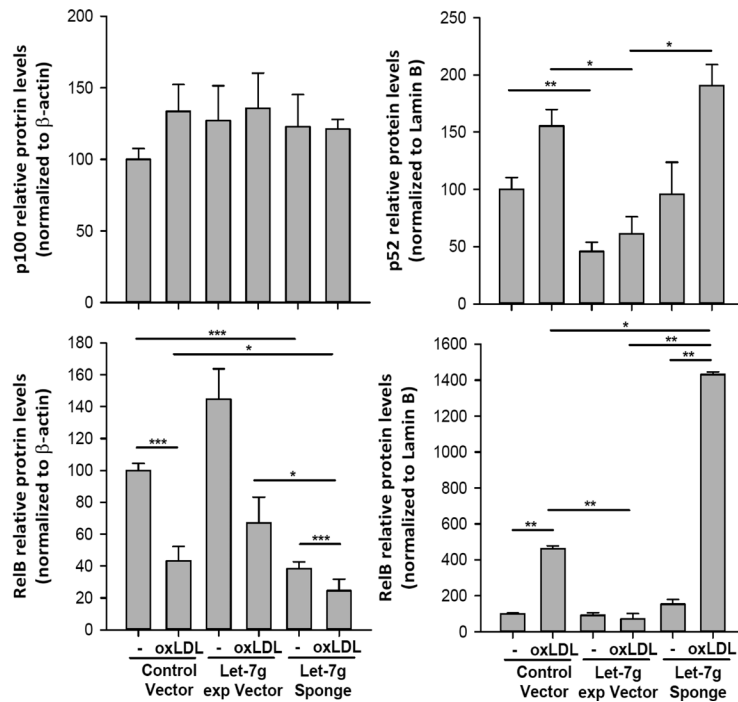

**Supplementary Figure 16: Semi-quantitative western blot data of let-7g's effect on p100, p52 and RelB relative proteins expression in macrophages.** Data are presented as mean  $\pm$  SEM from 3 independent experiments. \* $<$  0.05; \*\* $<$  0.01; \*\*\* $<$  0.001.

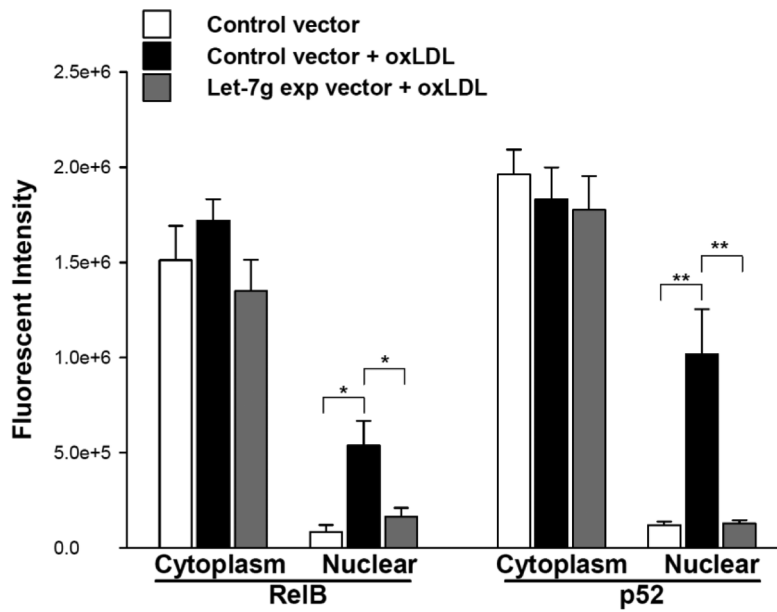

**Supplementary Figure 17: Semi-quantitative analysis of RelB or p52 fluorescence in the oxLDL treated-macrophages treated with control vector or Let-7g exp vector.** Data are presented as mean  $\pm$  SEM from 3 independent experiments. \* $<$  0.05; \*\* $<$  0.01.

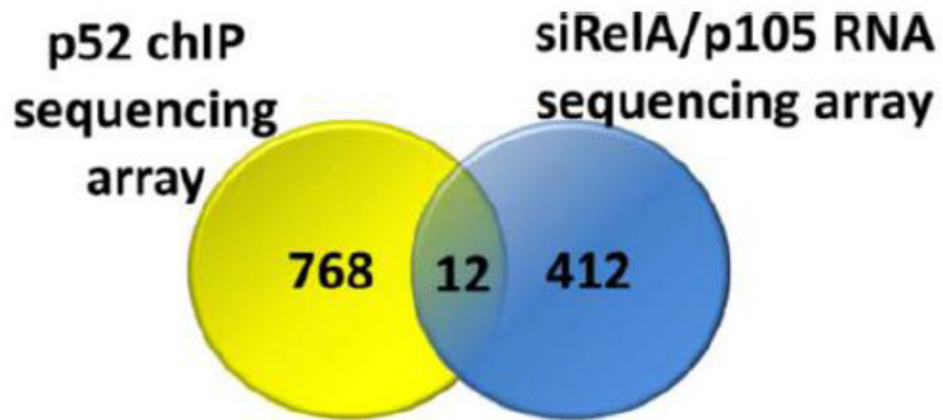

**Supplementary Figure 18: Venn diagram for Chip-seq and RNA-seq experiments.** Venn diagram shows p52 binding sites identified by p52 ChIP-seq and RNA-seq experiments in macrophages co-transfected with RelA-siRNA and p105-siRNA during foam cell formation. Twelve p52-affected and differentially expressed transcripts in the non-canonical pathway are indicated by the combination of results from ChIP-seq and RNA-seq experiments.

**Supplementary Table 1: Primer sets**

| Method     | Gene                               | Primer Sequence                                                    | Reference |
|------------|------------------------------------|--------------------------------------------------------------------|-----------|
| QRT-PCR    | <b>IKK<math>\alpha</math></b>      | F: 5'-CAGCCATTTACCTGGCATGAG-3'<br>R: 5'-GAGGGTCCCAATTCAACATCAA-3'  | [1]       |
|            | <b>p53</b>                         | F: 5'-CCCAAGCAATGGATGATTTGA-3'<br>R: 5'-GGCATTCTGGGAGCTTCATCT-3'   | [2]       |
|            | <b>GAPDH</b>                       | F: 5'-ACCCACTCCTCCACCTTTGA-3'<br>R: 5'-CTGTTGCTGTAGCCAAATTCGT-3'   | [3]       |
|            | <b>SREBF2</b>                      | F: 5'-CGAATTGAAAGACCTGGTCATG-3'<br>R: 5'-TCCTCAGAACGCCAGACTTGT-3'  | [4]       |
| ChIP Assay | <b>SREBF2</b><br>(-1615 bp region) | F: 5'-CAACTCCTGACCTCAAATGATCTG-3'<br>R: 5'-GCTCTCGGCATAAGCTTTGG-3' |           |
|            | (-15 bp region)                    | F: 5'-CCCATTGACAACAAACAG-3'<br>R: 5'-CCGCCATGTTTGCGTTGC-3'         |           |
| Genotyping | <b>Cre</b>                         |                                                                    | [5]       |
|            | NLSCre                             | 5'-CCCAAGAAGAAGAGGAAGGTGTCC-3'                                     |           |
|            | Cre8                               | 5'-CCCAGAAATGCCAGATTACG-3'                                         |           |
|            | <b>apoE</b>                        |                                                                    | [6]       |
|            | Primer 1                           | 5'-GCCTAGCCGAGGGAGAGCCG-3'                                         |           |
|            | Primer 2                           | 5'-TGTGACTTGGGAGCTCTGCAGC-3'                                       |           |
|            | Primer 3                           | 5'-GCCGCCCCGACTGCATCT-3'                                           |           |

**Supplementary Table 2: 29 NF- $\kappa$ B related genes**

| let7g and NF $\kappa$ B | DIANAmT | miRanda | miRDB | miRWalk | RNAhybrid | PICTAR5 | PITA | RNA22 | Targetscan | SUM |
|-------------------------|---------|---------|-------|---------|-----------|---------|------|-------|------------|-----|
| AZI2                    | 0       | 1       | 0     | 1       | 0         | 0       | 0    | 0     | 0          | 2   |
| BCL10                   | 0       | 1       | 0     | 1       | 0         | 0       | 0    | 0     | 0          | 2   |
| BTRC                    | 0       | 1       | 0     | 1       | 0         | 0       | 0    | 0     | 0          | 2   |
| CASP8                   | 0       | 0       | 0     | 0       | 0         | 1       | 0    | 0     | 0          | 1   |
| CD40LG                  | 0       | 0       | 0     | 0       | 0         | 1       | 0    | 0     | 0          | 1   |
| IKK $\alpha$            | 1       | 1       | 1     | 1       | 0         | 1       | 0    | 0     | 1          | 6   |
| EIF2AK2                 | 1       | 0       | 0     | 0       | 0         | 1       | 1    | 0     | 0          | 3   |
| GSK3B                   | 0       | 1       | 0     | 1       | 0         | 0       | 0    | 0     | 0          | 2   |
| LCK                     | 0       | 1       | 0     | 0       | 0         | 0       | 0    | 0     | 0          | 1   |
| MALT1                   | 0       | 0       | 0     | 0       | 0         | 1       | 1    | 0     | 0          | 2   |
| MEKK1                   | 1       | 1       | 0     | 1       | 0         | 1       | 0    | 0     | 1          | 5   |
| MAP3K8                  | 0       | 1       | 0     | 1       | 0         | 0       | 0    | 0     | 0          | 2   |
| MAPK8                   | 1       | 0       | 0     | 0       | 0         | 0       | 0    | 0     | 0          | 1   |
| MYD88                   | 0       | 1       | 0     | 1       | 0         | 0       | 0    | 0     | 0          | 2   |
| NFKB2                   | 0       | 1       | 0     | 1       | 0         | 0       | 0    | 0     | 0          | 2   |
| NGF                     | 1       | 1       | 1     | 1       | 0         | 1       | 0    | 1     | 1          | 7   |
| RELB                    | 0       | 1       | 0     | 0       | 0         | 0       | 0    | 0     | 0          | 1   |
| RIPK1                   | 0       | 0       | 0     | 0       | 0         | 1       | 0    | 0     | 0          | 1   |
| TANK                    | 0       | 1       | 0     | 0       | 0         | 0       | 0    | 0     | 0          | 1   |
| TBK1                    | 0       | 1       | 0     | 0       | 0         | 0       | 0    | 0     | 0          | 1   |
| TIRAP                   | 0       | 0       | 0     | 0       | 0         | 1       | 0    | 0     | 0          | 1   |
| A20                     | 1       | 1       | 0     | 1       | 0         | 1       | 0    | 0     | 1          | 5   |
| TNFSF11                 | 0       | 1       | 0     | 1       | 0         | 0       | 0    | 0     | 0          | 2   |
| TNFSF13B                | 0       | 1       | 0     | 0       | 0         | 1       | 0    | 0     | 0          | 2   |
| TNIP1                   | 0       | 1       | 0     | 0       | 0         | 0       | 0    | 0     | 0          | 1   |
| TRADD                   | 0       | 0       | 0     | 0       | 0         | 1       | 0    | 0     | 0          | 1   |
| TRAF2                   | 0       | 1       | 0     | 1       | 0         | 0       | 0    | 0     | 0          | 2   |
| TRAF6                   | 0       | 0       | 0     | 0       | 0         | 1       | 0    | 0     | 0          | 1   |
| UBE2N                   | 0       | 1       | 0     | 1       | 0         | 0       | 0    | 0     | 0          | 2   |

**Supplementary Table 3: Gene ontology annotation of 12 genes which were directly affected by p52 in the non-canonical pathway**

|                                     | <b>Fold Change</b> | <b>Molecule Function</b>    | <b>Biological Process</b>                          | <b>Cellular Component</b> |
|-------------------------------------|--------------------|-----------------------------|----------------------------------------------------|---------------------------|
| <b>Foam Cell Formation</b>          |                    |                             |                                                    |                           |
| ATGL                                | 2.21               | Protein binding             | Lipid catabolic process                            | Cytosol                   |
| MARCO                               | 0.33               | Scavenger receptor activity | Receptor-mediated endocytosis                      | Membrane                  |
| <b>Macrophage Movement</b>          |                    |                             |                                                    |                           |
| NPAS3                               | 35.83              | Signal transducer activity  | Locomotory behavior                                | Cytoplasm                 |
| TNC                                 | 5.65               | Fibronectin binding         | Extracellular matrix organization                  | Extracellular matrix      |
| DNAH11                              |                    | Microtubule motor activity  | Microtubule-based movement                         | Axonemal dynein complex   |
| <b>Response to Oxidative Stress</b> |                    |                             |                                                    |                           |
| RRM2B                               | 2.33               | Oxidoreductase activity     | Response to oxidative stress                       | Mitochondrion             |
| <b>Cell Apoptosis</b>               |                    |                             |                                                    |                           |
| DAB2IP                              | 18.81              | Protein binding             | Induction of apoptosis via death domain receptors  | Cytoplasm                 |
| OBSCN                               | 0.19               | Protein binding             | Positive regulation of apoptotic process           | Cytosol                   |
| <b>Others</b>                       |                    |                             |                                                    |                           |
| THAP8                               | 3.06               | DNA binding                 | NA                                                 | NA                        |
| ZNF625                              | 2.26               | DNA binding                 | Regulation of transcription                        | Nucleus                   |
| ATAD3A                              | 0.35               | ATP binding                 | Cell growth                                        | Mitochondrion             |
| NUBPL                               | 0.32               | ATP binding                 | Mitochondrial respiratory chain complex I assembly | Mitochondrion             |

**Supplementary Table 4: List of siRNAs used in this study**

| <b>siRNA</b>    | <b>Accession No.</b> | <b>Sequence</b>     |
|-----------------|----------------------|---------------------|
| p105 siRNA-1    | NM_003998            | GGGUAUAGCUUCCCACACU |
| p105 siRNA-2    |                      | AGUGUGGGAAGCUAUACCC |
| Rel A siRNA-1   | NM_021975            | GGAAUCCAGUGUGUGAAGA |
| Rel A siRNA-2   |                      | UCUUCACACACUGGAUCC  |
| p100 siRNA-1    | NM_001077493         | CUGUCAAGAUCUGAACUA  |
| p100 siRNA-2    |                      | UAGUUACAGAUCUUGACAG |
| Rel B siRNA-1   | NM_006509            | GAGAUUGUCGAGCCCGUGA |
| Rel B siRNA-2   |                      | UCACGGGCUCGACAAUCUC |
| Control siRNA-1 |                      | GAUCAUACGUGCGAUCAGA |
| Control siRNA-2 |                      | UCUGAUCGCACGUAUGAUC |

## REFERENCES

1. Jiang R, Xia Y, Li J, Deng L, Zhao L, Shi J, Wang X, Sun B. High expression levels of IKK $\alpha$  and IKK $\beta$  are necessary for the malignant properties of liver cancer. *Int J Cancer*. 2010; 126:1263–74.
2. Scherz-Shouval R, Weidberg H, Gonen C, Wilder S, Elazar Z, Oren M. p53-dependent regulation of autophagy protein LC3 supports cancer cell survival under prolonged starvation. *Proc Natl Acad Sci USA*. 2010; 107:18511–16.
3. Shema-Yaacoby E, Nikolov M, Haj-Yahya M, Siman P, Allemand E, Yamaguchi Y, Muchardt C, Urlaub H, Brik A, Oren M, Fischle W. Systematic identification of proteins binding to chromatin-embedded ubiquitylated H2B reveals recruitment of SWI/SNF to regulate transcription. *Cell Reports*. 2013; 4:601–08.
4. Rice SJ, Lai SC, Wood LW, Helsley KR, Runkle EA, Winslow MM, Mu D. MicroRNA-33a mediates the regulation of high mobility group AT-hook 2 gene (HMGA2) by thyroid transcription factor 1 (TTF-1/NKX2-1). *J Biol Chem*. 2013; 288:16348–60.
5. Clausen BE, Burkhardt C, Reith W, Renkawitz R, Förster I. Conditional gene targeting in macrophages and granulocytes using LysMcre mice. *Transgenic Res*. 1999; 8:265–77.
6. Clarke MC, Figg N, Maguire JJ, Davenport AP, Goddard M, Littlewood TD, Bennett MR. Apoptosis of vascular smooth muscle cells induces features of plaque vulnerability in atherosclerosis. *Nat Med*. 2006; 12:1075–80.
